# Supplementary material for: Liver and Muscle Transcriptomes Differ in Mid-Lactation Cows Divergent in Feed Efficiency in the Presence or Absence of Supplemental Rumen-Protected Choline
Source: MDPI journal article supplement (doi:10.3390/metabo13091023), 2023-09-19
Supplement: s1 [file s1]

## SUPPLEMENTARY MATERIALS

### *Midpoint Residual Feed Intake Calculation*

To reduce the number of cows subjected to biopsy procedures, liver and muscle tissue samples were collected by biopsy from 32 of the 64 cows. The 32 cows selected for biopsies were identified by a midpoint RFI calculation. Dry matter intake for each cow was computed as a function of major energy sinks using the `lm` function in R 4.2.1 (R Core Team, 2022). The midpoint RFI model was:

$$\text{DMI} = \mu + \text{MilKE} + \beta_2 \times \text{MBW} + \beta_3 \times \Delta\text{BW} + \beta_4 \times \text{DIM} + \text{RFI},$$

where DMI was the observed DMI (kg),  $\mu$  is the overall mean, and MilKE, MBW,  $\Delta\text{BW}$ , and DIM are the secreted milk energy, metabolic BW, daily change in BW, and DIM, respectively. Regression coefficients  $\beta_1$ ,  $\beta_2$ ,  $\beta_3$ , and  $\beta_4$  correspond to secreted milk energy, metabolic BW, daily change in BW, and DIM, respectively. The random residual, RFI, was the RFI phenotype measured. The 16 cows with the highest RFI and the 16 cows with the lowest RFI, balanced by dietary treatment, were selected for biopsies, with the goal of capturing the true top 12 and bottom 12 cows when calculating the final RFI.

Between the midpoint and final RFI calculations, minor re-ranking occurred (spearman's correlation coefficient = 0.91). However, the true top 12 and bottom 12 of RFI were maintained in the top 13 and bottom 12, respectively, in the final RFI.

### *Blood Metabolite Quantification*

Quantification of plasma BHB (C444-OA, Catachem), glucose (C124-06, Catachem), albumin (C244-01, Catachem), BUN (C264-03, Catachem), creatinine (V320-24, Catachem),

alanine aminotransferase (**ALT**; C164-0A, Catachem) , and aspartate amino transferase (**AST**; C164-0A, Catachem) were based on previously described chemistries and determined using Catachem VETSPEC reagents on the Catachem Well-T AutoAnalyzer using recommended protocols from the manufacturer (Catachem, Oxford, CT). A linear standard curve was generated using standards from the manufacturer suitable for each metabolite (C444-10, C444-11, and C444-12 for BHB; C1200-10, C1200-11, and C1200-12 for albumin, BUN, creatinine, glucose, AST, and ALT; Catachem). Standards were within the expected calibrated ranges provided by the manufacturer (Catachem). Samples were read by the autoanalyzer in cuvettes either in duplicate (BHB, glucose, albumin, BUN) or triplicate (ALT and AST). A plasma pool was run with every set of samples. The concentration or activity of the unknown samples were determined based on the linear standard curve.

The concentration of BHB was determined using BHB dehydrogenase to measure the reduction of NAD to NADH and read at 340 nm (Koch and Feldbruegge, 1987). Concentration of glucose was determined from the NADH produced from using hexokinase to generate glucose-6-phosphate and subsequent oxidation to phosphoglucono-lactone and read at 340 nm (León et al., 1977). Albumin concentration was determined using tetrabromo-m-cresolphthalein dye and read at 630 nm (Doumas et al., 1971). Concentration of BUN was determined using urease and glutamate dehydrogenase to measure the oxidation of acetyl-NADH to acetyl-NAD and read at 340 nm (Talke and Schubert, 1965). Creatinine concentration was determined using picric acid to produce a red Tautomer complex and read at 505 nm (Chasson et al., 1960). Activity of ALT was determined using L-alanine and  $\alpha$ -ketoglutarate to measure the oxidation of NADH<sup>+</sup> to NAD from pyruvate and read at 340 nm (Provisional recommendations on IFCC methods for the measurement of catalytic concentrations of enzymes. Part 2. IFCC method for aspartate aminotransferase, 1977).

Activity of AST was determined using L-aspartate and  $\alpha$ -ketoglutarate to measure the oxidation of NADH<sup>+</sup> to NAD from oxaloacetate and read at 340 nm (Bergmeyer et al., 1976).

Quantification of plasma triglyceride (C116-0A, Catachem) was quantified using Catachem VETSPEC reagents using a modified protocol. Determination of triglyceride concentration was based on a multi-step reaction in which final product, quinonemine dye, was read at 505 nm (Trinder, 1969). In place of using the Catachem specific standards (C1200-10, C1200-11, and C1200-12; Catachem) to generate the linear standard curve, a serial dilution (1:2) of a standard (464-01601; Fujifilm Wako Chemicals USA) was used to establish the linear standard curve. Samples were quantified using the generated standard curve in place of the auto-analyzer generated curve.

Quantification of plasma fatty acids (C514-0A; Catachem) and serum bilirubin (C304-0A; Catachem) were quantified using Catachem VETSPEC reagents with modified protocols and read on a Synergy H1 Hybrid Spectrophotometer (BioTek, Winooski, VT, USA). A serial dilution (1:2) of a standard for fatty acids (NEFA standard solution; Fujifilm Wako Chemicals USA) and for bilirubin (C1200-10; Catachem) were used to establish a standard curve for the quantification of fatty acids and bilirubin, respectively. The concentration of fatty acids was determined using a multi-step reaction in which the final product, quinoneindamine dye, was read at 545 nm (Trout et al., 1960; Itaya and Ui, 1965; Novak, 1965). The concentration of bilirubin was determined using diazotized sulfanilic acid to form an azo-Bilirubin complex and read at 545 nm (Van den Bergh and Snapper, 1913).

### ***Muscle Tissue Biopsy***

Semitendinosus muscle tissue were collected from the right upper hindlimb. The right upper hindlimb region was cleaned from debris using a stiff brush, shaved, and the tail tied off to the left using hosiery. The surgical field was prepared by alternating washes of povidone iodine (0.75% titratable iodine, First Priority, Elgin, IL) and 70% ethanol solution, 3 times each. A 10 mL injection of lidocaine hydrochloride injectable-2% (Clipper Distribution Company, St. Joseph, MO) was given subcutaneously at the planned incision site. A straight-line incision was made (~ 1 inch) and a sterile 8 mm punch biopsy tool (Miltex model 33-57, Integra LifeSciences, Princeton, NJ) was used to collect muscle tissue (~ 1 g). The incision was sutured with sterile non-absorbable suture material (USP 1, Braunamid white, Jorgensen Lab, Loveland, CO). The incision site and health of the cow was monitored by the research staff and a veterinarian for 5 d post operation. Sutures were removed at 7 to 10 d post operation.

## REFERENCES

- Van den Bergh, A.A.H., and J. Snapper. 1913. Die Farbstoffe des Blutserums. *Dtsch. Arch. Klin. Med.* 110:540.
- Bergmeyer, H.U., G.N.J. Bowers, M. Horder, and D.W. Moss. 1976. Provisional recommendations on IFCC methods for the measurement of catalytic concentrations of enzymes. Part 2. IFCC method for aspartate aminotransferase. *Clin. Chim. Acta.* 70:F19-29.
- Chasson, A.L., H.J. Grady, and M.A. Stanley. 1960. Determination of creatinine by means of automatic chemical analysis. *Tech. Bull. Regist. Med. Technol. Am. Soc. Clin. Pathol. Regist. Med. Technol.* 30:207–212.
- Doumas, B.T., W.A. Watson, and H.G. Biggs. 1971. Albumin standards and the measurement of serum albumin with bromocresol green. *Clin. Chim. Acta.* 31:87–96.  
[https://doi.org/10.1016/0009-8981\(71\)90365-2](https://doi.org/10.1016/0009-8981(71)90365-2).
- Holtenius, P., and K. Holtenius. 2007. A model to estimate insulin sensitivity in dairy cows. *Acta Vet. Scand.* 49. <https://doi.org/10.1186/1751-0147-49-29>.
- Itaya, K., and M. Ui. 1965. Colormetric determination of free fatty acids in biological fluids. *J. Lipid Res.* 6:16–20.
- Koch, D.D., and D.H. Feldbruegge. 1987. Optimized kinetic method for automated determination of  $\beta$ -hydroxybutyrate. *Clin. Chem.* 33:1761–1766.  
<https://doi.org/10.1093/clinchem/33.10.1761>.

- León, L.P., M. Sansur, L.R. Snyder, and C. Horvath. 1977. Continuous-flow analysis for glucose, triglycerides, and ATP with immobilized enzymes in tubular form. *Clin. Chem.* 23:1556–1562
- Novak, M. 1965. Colormetric ultramicro method for the determination of free fatty acids. *J. Lipid Res.* 6:431–433.
- Provisional recommendations on IFCC methods for the measurement of catalytic concentrations of enzymes. Part 2. IFCC method for aspartate aminotransferase. 1977. . *J. Clin. Chem. Clin. Biochem.* 15:39–51.
- Talke, H., and G.E. Schubert. 1965. Enzymatic urea determination in the blood and serum in the Warbug optical test. *Klin. Wochenschr.* 43:174–175. <https://doi.org/10.1007/BF01484513>.
- Trinder, P. 1969. Determination of glucose in blood using glucose oxidase with an alternative oxygen acceptor. *Ann. Clin. Biochem.* 6:24.  
<https://doi.org/https://doi.org/10.1177/000456326900600108>.
- Trout, D.L., E.H.J. Estes, and S.J. Friedberg. 1960. Titration of free fatty acids of plasma: a study of current methods and a new modification. *J. Lipid Res.* 1:199–202.

**Supplemental Table S1.** Least squares means and 95% confidence intervals of blood metabolites between mid-lactation cows supplemented with rumen protected choline (RPC) or not (CTL).

| Metabolite <sup>2</sup> | Treatment <sup>1</sup> |              |      |              | <i>P</i> -value |
|-------------------------|------------------------|--------------|------|--------------|-----------------|
|                         | CTL                    |              | RPC  |              |                 |
| BHB, mmol/L             | 0.67                   | [0.57, 0.78] | 0.68 | [0.58, 0.79] | 0.83            |
| Glucose, mg/dL          | 62.4                   | [60.6, 64.2] | 63.6 | [61.9, 65.3] | 0.29            |
| Fatty acids, mmol/L     | 0.13                   | [0.12, 0.15] | 0.13 | [0.11, 0.14] | 0.45            |
| Triglyceride, mg/dL     | 9.0                    | [8.1, 9.9]   | 8.5  | [7.6, 9.4]   | 0.25            |
| Albumin, g/dL           | 3.73                   | [3.69, 3.78] | 3.82 | [3.75, 3.89] | 0.05            |
| Bilirubin, mg/dL        | 0.08                   | [0.07, 0.11] | 0.08 | [0.06, 0.10] | 0.31            |
| BUN, mg/dL              | 17.5                   | [19.2, 16]   | 17.7 | [19.4, 16.2] | 0.73            |
| Creatinine, mg/dL       | 0.67                   | [0.64, 0.71] | 0.69 | [0.66, 0.73] | 0.32            |
| ALT, U/L                | 32.2                   | [29.9, 34.6] | 30.3 | [28.3, 32.5] | 0.24            |
| AST, U/L                | 123                    | [110, 136]   | 132  | [120, 145]   | 0.20            |
| Insulin, µg/L           | 0.46                   | [0.32, 0.67] | 0.48 | [0.33, 0.7]  | 0.77            |
| RQUICKI <sup>3</sup>    | 0.53                   | [0.49, 0.57] | 0.54 | [0.5, 0.58]  | 0.42            |

<sup>1</sup>Cows were randomly assigned to treatment. RPC, n = 31; CTL, n = 29.

The PROC MIXED procedures of SAS (v 9.4, SAS Institute Inc., Cary, NC) were used and the model included the fixed effect of treatment and the random effect of day of sampling. Non-normal residuals resulted in the data being transformed via Box-Cox transformation. Persistent non-normal residuals were subject to modeling heterogeneous variance using PROC GLIMMIX.

<sup>2</sup>ALT = alanine aminotransferase; AST = aspartate aminotransferase.

<sup>3</sup>Revised quantitative insulin sensitivity check index (Holtenius and Holtenius, 2007) calculated as: RQUICKI = 1/[log (glucose mg/dL) + log (insulin µIU/mL) + log (non-esterified fatty acids mmol/L)].

**Supplemental Table S2.** Least squares means and 95% confidence intervals of blood plasma fatty acids between mid-lactation cows supplemented with rumen protected choline (RPC) or not (CTL).

| Fatty Acid,<br>mg/dL <sup>2</sup> | Treatment <sup>1</sup> |                |       |                | <i>P</i> -value |
|-----------------------------------|------------------------|----------------|-------|----------------|-----------------|
|                                   | CTL                    |                | RPC   |                |                 |
| C14:0                             | 0.43                   | [0.41, 0.45]   | 0.44  | [0.42, 0.46]   | 0.92            |
| C15:0                             | 0.31                   | [0.29, 0.32]   | 0.31  | [0.29, 0.32]   | 0.92            |
| C16:0                             | 3.94                   | [3.71, 4.18]   | 3.97  | [3.74, 4.2]    | 0.83            |
| C16:1                             | 0.65                   | [0.63, 0.68]   | 0.65  | [0.63, 0.68]   | 0.94            |
| C17:0                             | 0.80                   | [0.75, 0.86]   | 0.80  | [0.75, 0.85]   | 0.91            |
| C18:0                             | 4.60                   | [4.25, 4.95]   | 4.61  | [4.26, 4.95]   | 0.98            |
| C18:1                             | 3.15                   | [2.91, 3.38]   | 3.16  | [2.96, 3.37]   | 0.89            |
| C18:2                             | 13.21                  | [12.11, 14.31] | 13.10 | [12.02, 14.17] | 0.85            |
| C18:3                             | 2.20                   | [2.04, 2.35]   | 2.21  | [2.06, 2.36]   | 0.88            |
| C20:3                             | 1.33                   | [1.26, 1.40]   | 1.36  | [1.29, 1.42]   | 0.56            |
| C20:4                             | 0.74                   | [0.72, 0.76]   | 0.74  | [0.73, 0.76]   | 0.76            |

<sup>1</sup>Cows were randomly assigned to treatment. RPC, n = 31; CTL, n = 29. The PROC MIXED procedures of SAS (v 9.4, SAS Institute Inc., Cary, NC) were used and the model included the fixed effect of treatment and the random effect of day of sampling. Non-normal residuals resulted in the data being transformed via Box-Cox transformation. Persistent non-normal residuals were subject to modeling heterogeneous variance using PROC GLIMMIX.

<sup>2</sup>C16:1 = myristoleate (cis-9); C18:1 = oleate (cis-9); C18:2 = linoleate (cis-9,12); C18:3 = linolenate (cis-9,12,15); C20:3 = eicosatrienoate (cis-11,14,17); C20:4 = arachidonate (cis-5,8,11,14).

**Supplemental Table S3.** Differentially expressed genes in the liver tissue between feed efficient (HE) and feed inefficient (LE) mid-lactation cows<sup>1</sup>.

| Gene <sup>2</sup>                                        | Gene Symbol | Mean <sup>3</sup> | Fold Change | P-value | Expression <sup>4</sup> |
|----------------------------------------------------------|-------------|-------------------|-------------|---------|-------------------------|
| acetyl-CoA carboxylase beta                              | ACACB       | 143               | 2.20        | 0.00066 | Down                    |
| ADAM metallopeptidase domain 22                          | ADAM22      | 318               | 1.65        | 0.00197 | Up                      |
| AHNAK nucleoprotein 2                                    | AHNAK2      | 79                | 1.71        | 0.03924 | Down                    |
| anillin, actin binding protein                           | ANLN        | 172               | 1.61        | 0.00860 | Up                      |
| acyloxyacyl hydrolase                                    | AOAH        | 397               | 1.74        | 0.00146 | Up                      |
| adaptor related protein complex 3 subunit mu 2           | AP3M2       | 65                | 1.60        | 0.00459 | Down                    |
| apolipoprotein B mRNA editing enzyme catalytic subunit 2 | APOBEC2     | 69                | 1.90        | 0.00365 | Down                    |
| aquaporin 2                                              | AQP2        | 17                | 3.19        | 0.00247 | Down                    |
| Rho GTPase activating protein 11A                        | ARHGAP11A   | 101               | 1.95        | 0.00662 | Up                      |
| assembly factor for spindle microtubules                 | ASPM        | 174               | 1.69        | 0.02518 | Up                      |
| basic helix-loop-helix family member a15                 | BHLHA15     | 303               | 1.62        | 0.02782 | Down                    |
| basic helix-loop-helix family member e23                 | BHLHE23     | 12                | 1.89        | 0.00551 | Down                    |
| baculoviral IAP repeat containing 5                      | BIRC5       | 89                | 1.73        | 0.01176 | Up                      |
| BUB1 mitotic checkpoint serine/threonine kinase          | BUB1        | 104               | 2.10        | 0.00123 | Up                      |
| BUB1 mitotic checkpoint serine/threonine kinase B        | BUB1B       | 94                | 2.15        | 0.00152 | Up                      |
| chromosome 16 C1orf105 homolog                           | C16H1orf105 | 97                | 1.52        | 0.01098 | Up                      |
| uncharacterized C20H5orf49                               | C20H5orf49  | 88                | 4.29        | 0.00388 | Down                    |
| chromosome 2 C2orf88 homolog                             | C2H2orf88   | 326               | 2.43        | 0.02675 | Down                    |
| C-C motif chemokine ligand 24                            | CCL24       | 76                | 3.45        | 0.00585 | Down                    |
| C-C motif chemokine ligand 26                            | CCL26       | 15                | 1.67        | 0.01799 | Down                    |
| cyclin A2                                                | CCNA2       | 47                | 1.65        | 0.04497 | Up                      |
| cyclin B1                                                | CCNB1       | 41                | 1.74        | 0.03062 | Up                      |
| cyclin B2                                                | CCNB2       | 34                | 1.60        | 0.02762 | Up                      |
| cyclin E2                                                | CCNE2       | 87                | 1.51        | 0.00096 | Up                      |
| cyclin F                                                 | CCNF        | 38                | 1.59        | 0.04520 | Up                      |
| CD180 molecule                                           | CD180       | 306               | 1.50        | 0.02233 | Up                      |
| CD1e molecule                                            | CD1E        | 26                | 1.98        | 0.00602 | Up                      |
| CD300e molecule                                          | CD300E      | 61                | 1.64        | 0.02632 | Up                      |
| cell division cycle 20                                   | CDC20       | 44                | 1.65        | 0.03412 | Up                      |
| cell division cycle 25A                                  | CDC25A      | 49                | 1.61        | 0.03726 | Up                      |
| cell division cycle 6                                    | CDC6        | 35                | 2.11        | 0.00287 | Up                      |
| cell division cycle associated 8                         | CDCA8       | 22                | 1.58        | 0.04699 | Up                      |
| cyclin dependent kinase 1                                | CDK1        | 142               | 1.57        | 0.04411 | Up                      |
| cyclin dependent kinase inhibitor 2C                     | CDKN2C      | 87                | 1.71        | 0.00100 | Up                      |
| centromere protein E                                     | CENPE       | 125               | 1.90        | 0.00517 | Up                      |
| centromere protein F                                     | CENPF       | 406               | 2.07        | 0.00902 | Up                      |
| centromere protein W                                     | CENPW       | 12                | 2.05        | 0.00481 | Up                      |



|                                                                                 |         |      |      |         |      |
|---------------------------------------------------------------------------------|---------|------|------|---------|------|
| centrosomal protein 55                                                          | CEP55   | 30   | 2.28 | 0.00328 | Up   |
| cilia and flagella associated protein 43                                        | CFAP43  | 184  | 1.53 | 0.00584 | Up   |
| cholinergic receptor muscarinic 1                                               | CHRM1   | 109  | 1.94 | 0.01613 | Down |
| circadian associated repressor of transcription                                 | CIART   | 34   | 1.56 | 0.02981 | Down |
| cellular inhibitor of PP2A                                                      | CIP2A   | 146  | 1.50 | 0.01235 | Up   |
| Cbp/p300 interacting transactivator with Glu/Asp rich carboxy-terminal domain 1 | CITED1  | 10   | 1.79 | 0.02429 | Down |
| cytoskeleton associated protein 2                                               | CKAP2   | 250  | 1.71 | 0.00677 | Up   |
| cytoskeleton associated protein 2 like                                          | CKAP2L  | 84   | 1.91 | 0.00199 | Up   |
| chloride voltage-gated channel 2                                                | CLCN2   | 237  | 1.87 | 0.00000 | Down |
| C-type lectin domain family 4 member E                                          | CLEC4E  | 21   | 1.96 | 0.00313 | Up   |
| C-type lectin domain containing 6A                                              | CLEC6A  | 114  | 1.82 | 0.00174 | Up   |
| C-type lectin domain containing 7A                                              | CLEC7A  | 202  | 1.51 | 0.00323 | Up   |
| claspin                                                                         | CLSPN   | 76   | 1.60 | 0.01970 | Up   |
| carboxypeptidase M                                                              | CPM     | 155  | 1.53 | 0.04376 | Up   |
| cysteine rich with EGF like domains 2                                           | CRELD2  | 602  | 1.88 | 0.00510 | Down |
| cytochrome P450, family 2, subfamily J                                          | CYP2J2  | 30   | 1.53 | 0.01949 | Up   |
| uncharacterized CYR61                                                           | CYR61   | 170  | 1.60 | 0.01665 | Down |
| DEP domain containing 1                                                         | DEPDC1  | 46   | 1.99 | 0.01920 | Up   |
| diaphanous related formin 3                                                     | DIAPH3  | 30   | 1.81 | 0.01192 | Up   |
| DLG associated protein 5                                                        | DLGAP5  | 69   | 2.11 | 0.00270 | Up   |
| DNA replication helicase/nuclease 2                                             | DNA2    | 27   | 1.67 | 0.00886 | Up   |
| delta/notch like EGF repeat containing                                          | DNER    | 25   | 2.19 | 0.01947 | Up   |
| E2F transcription factor 7                                                      | E2F7    | 16   | 1.71 | 0.02325 | Up   |
| E2F transcription factor 8                                                      | E2F8    | 23   | 1.98 | 0.01303 | Up   |
| epithelial cell transforming 2                                                  | ECT2    | 110  | 1.63 | 0.01574 | Up   |
| epithelial membrane protein 1                                                   | EMP1    | 67   | 1.51 | 0.03007 | Up   |
| ERCC excision repair 6 like, spindle assembly checkpoint helicase               | ERCC6L  | 49   | 1.77 | 0.00254 | Up   |
| establishment of sister chromatid cohesion N-acetyltransferase 2                | ESCO2   | 62   | 1.55 | 0.01277 | Up   |
| extra spindle pole bodies like 1, separase                                      | ESPL1   | 81   | 1.61 | 0.04671 | Up   |
| exonuclease 1                                                                   | EXO1    | 20   | 2.24 | 0.00492 | Up   |
| uncharacterized FAM19A3                                                         | FAM19A3 | 64   | 2.41 | 0.00055 | Down |
| FA complementation group I                                                      | FANCI   | 68   | 1.72 | 0.00504 | Up   |
| F-box protein 5                                                                 | FBXO5   | 46   | 1.85 | 0.00164 | Up   |
| fibroblast growth factor 21                                                     | FGF21   | 14   | 3.25 | 0.04477 | Up   |
| forkhead box M1                                                                 | FOXM1   | 44   | 1.56 | 0.02903 | Up   |
| FRAS1 related extracellular matrix 3                                            | FREM3   | 40   | 2.48 | 0.00125 | Down |
| polypeptide N-acetylgalactosaminyltransferase 5                                 | GALNT5  | 61   | 2.48 | 0.03855 | Down |
| growth arrest specific 2 like 3                                                 | GAS2L3  | 141  | 1.56 | 0.00083 | Up   |
| GTPase, IMAP family member 6                                                    | GIMAP6  | 826  | 2.28 | 0.01396 | Up   |
| GTPase, IMAP family member 8                                                    | GIMAP8  | 4723 | 2.88 | 0.01242 | Up   |
| GIN5 complex subunit 2                                                          | GIN52   | 22   | 1.65 | 0.03137 | Up   |

|                                                                                 |              |      |      |         |      |
|---------------------------------------------------------------------------------|--------------|------|------|---------|------|
| gliomedin                                                                       | GLDN         | 111  | 1.75 | 0.00382 | Up   |
| GDP-mannose pyrophosphorylase B                                                 | GMPPB        | 1393 | 1.72 | 0.00715 | Down |
| glycine N-methyltransferase                                                     | GNMT         | 10   | 3.28 | 0.01224 | Down |
| glycoprotein V platelet                                                         | GP5          | 47   | 1.77 | 0.00037 | Down |
| glutathione peroxidase 3                                                        | GPX3         | 7797 | 3.28 | 0.02324 | Down |
| glutathione S-transferase pi 1                                                  | GSTP1        | 790  | 1.56 | 0.04274 | Down |
| histone H2B-like                                                                | H2B          | 67   | 1.51 | 0.03728 | Up   |
| uncharacterized HIST1H1B                                                        | HIST1H1B     | 278  | 1.84 | 0.03058 | Up   |
| uncharacterized HIST1H2BI                                                       | HIST1H2BI    | 49   | 1.89 | 0.00710 | Up   |
| uncharacterized HIST1H2BJ                                                       | HIST1H2BJ    | 16   | 2.35 | 0.00399 | Up   |
| uncharacterized HIST1H2BN                                                       | HIST1H2BN    | 149  | 1.90 | 0.01139 | Up   |
| uncharacterized HIST1H3C                                                        | HIST1H3C     | 23   | 1.67 | 0.04320 | Up   |
| uncharacterized HIST1H3G                                                        | HIST1H3G     | 142  | 1.60 | 0.02595 | Up   |
| uncharacterized HIST2H2BF                                                       | HIST2H2BF    | 140  | 1.52 | 0.02146 | Up   |
| Holliday junction recognition protein                                           | HJURP        | 105  | 1.61 | 0.03547 | Up   |
| hydroxy-delta-5-steroid dehydrogenase, 3 beta-<br>and steroid delta-isomerase 1 | HSD3B1       | 180  | 1.55 | 0.01370 | Down |
| hypoxia up-regulated 1                                                          | HYOU1        | 3280 | 1.81 | 0.00527 | Down |
| indoleamine 2,3-dioxygenase 2                                                   | IDO2         | 3473 | 1.59 | 0.00006 | Down |
| insulin like growth factor 2 mRNA binding protein<br>3                          | IGF2BP3      | 38   | 2.41 | 0.01865 | Up   |
| interleukin 17B                                                                 | IL17B        | 66   | 2.17 | 0.00425 | Down |
| potassium voltage-gated channel subfamily H<br>member 7                         | KCNH7        | 36   | 4.40 | 0.00089 | Down |
| kinesin family member 11                                                        | KIF11        | 124  | 2.13 | 0.00172 | Up   |
| kinesin family member 15                                                        | KIF15        | 55   | 2.36 | 0.00056 | Up   |
| kinesin family member 18A                                                       | KIF18A       | 44   | 1.91 | 0.00176 | Up   |
| kinesin family member 20A                                                       | KIF20A       | 110  | 1.62 | 0.03481 | Up   |
| kinesin family member 22                                                        | KIF22        | 53   | 1.72 | 0.02123 | Up   |
| kinesin family member 2C                                                        | KIF2C        | 30   | 1.70 | 0.03276 | Up   |
| kinesin family member 4A                                                        | KIF4A        | 81   | 2.10 | 0.00240 | Up   |
| kinesin family member C1                                                        | KIFC1        | 74   | 1.55 | 0.03699 | Up   |
| killer cell lectin like receptor F1                                             | KLRF1        | 25   | 1.70 | 0.04322 | Up   |
| kinetochore scaffold 1                                                          | KNL1         | 182  | 2.12 | 0.00087 | Up   |
| kinetochore associated 1                                                        | KNTC1        | 107  | 1.68 | 0.00582 | Up   |
| interleukin 32-like                                                             | LOC100139916 | 59   | 4.98 | 0.00368 | Down |
| uncharacterized LOC100196897                                                    | LOC100196897 | 13   | 1.84 | 0.00783 | Up   |
| WAP four-disulfide core domain protein 18                                       | LOC100296618 | 22   | 5.02 | 0.00859 | Up   |
| translation initiation factor IF-2-like                                         | LOC100847999 | 28   | 1.53 | 0.00249 | Up   |
| uncharacterized LOC100848294                                                    | LOC100848294 | 20   | 1.93 | 0.01584 | Up   |
| uncharacterized LOC100848642                                                    | LOC100848642 | 13   | 1.61 | 0.01591 | Down |
| uncharacterized LOC100849050                                                    | LOC100849050 | 36   | 1.53 | 0.00329 | Up   |
| uncharacterized LOC100850437                                                    | LOC100850437 | 49   | 1.63 | 0.04618 | Down |
| uncharacterized LOC101901915                                                    | LOC101901915 | 15   | 1.90 | 0.00178 | Up   |

|                                                                 |              |       |      |         |      |
|-----------------------------------------------------------------|--------------|-------|------|---------|------|
| uncharacterized LOC101902043                                    | LOC101902043 | 42    | 1.78 | 0.00074 | Up   |
| GTPase IMAP family member 7-like                                | LOC101902675 | 20    | 2.57 | 0.00086 | Up   |
| isocitrate dehydrogenase [NADP] cytoplasmic pseudogene          | LOC101903193 | 35    | 1.58 | 0.03600 | Up   |
| 60S ribosomal protein L15 pseudogene                            | LOC101903301 | 52    | 3.74 | 0.00074 | Down |
| uncharacterized LOC101903832                                    | LOC101903832 | 64    | 1.64 | 0.01128 | Down |
| cationic amino acid transporter 3-like                          | LOC101904151 | 24    | 1.51 | 0.04679 | Up   |
| zinc finger protein 160 pseudogene                              | LOC101905179 | 157   | 1.77 | 0.00005 | Down |
| fibrous sheath-interacting protein 2-like                       | LOC101905293 | 119   | 1.61 | 0.03248 | Up   |
| heme-binding protein 1 pseudogene                               | LOC101905801 | 110   | 2.60 | 0.04838 | Up   |
| BOLA class I histocompatibility antigen, alpha chain BL3-7-like | LOC101905956 | 4383  | 1.50 | 0.01116 | Up   |
| ubiquitin-fold modifier 1 pseudogene                            | LOC101906021 | 27    | 3.17 | 0.01716 | Down |
| uncharacterized LOC101907141                                    | LOC101907141 | 19    | 1.78 | 0.00613 | Down |
| zinc finger protein 852-like                                    | LOC101909173 | 107   | 1.64 | 0.00108 | Down |
| uncharacterized LOC104968446                                    | LOC104968446 | 59    | 2.14 | 0.00399 | Up   |
| uncharacterized LOC104968456                                    | LOC104968456 | 128   | 1.98 | 0.00160 | Up   |
| uncharacterized LOC104968518                                    | LOC104968518 | 16    | 1.65 | 0.00093 | Up   |
| uncharacterized LOC104969356                                    | LOC104969356 | 33    | 1.67 | 0.04232 | Up   |
| uncharacterized LOC104969981                                    | LOC104969981 | 15    | 2.06 | 0.03716 | Down |
| uncharacterized LOC104973604                                    | LOC104973604 | 12    | 3.45 | 0.00483 | Up   |
| uncharacterized LOC104975099                                    | LOC104975099 | 14    | 1.65 | 0.00131 | Down |
| uncharacterized LOC104975676                                    | LOC104975676 | 42    | 2.09 | 0.00490 | Up   |
| uncharacterized LOC104976195                                    | LOC104976195 | 53    | 1.85 | 0.03385 | Down |
| uncharacterized LOC107132336                                    | LOC107132336 | 19    | 1.54 | 0.01273 | Up   |
| uncharacterized LOC107133343                                    | LOC107133343 | 1171  | 3.98 | 0.02606 | Down |
| interferon-induced transmembrane protein 3-like                 | LOC112441484 | 505   | 2.32 | 0.00729 | Down |
| small nucleolar RNA SNORD67                                     | LOC112441674 | 50    | 1.55 | 0.01922 | Up   |
| immunoglobulin lambda-like polypeptide 5                        | LOC112442062 | 25    | 1.83 | 0.01927 | Down |
| sialic acid-binding Ig-like lectin 14                           | LOC112442215 | 257   | 2.21 | 0.01502 | Up   |
| translation initiation factor IF-2-like                         | LOC112442408 | 1315  | 1.53 | 0.04211 | Down |
| potassium voltage-gated channel subfamily H member 7-like       | LOC112442562 | 29    | 4.22 | 0.00094 | Down |
| uncharacterized LOC112442703                                    | LOC112442703 | 12    | 1.95 | 0.04911 | Down |
| U1 spliceosomal RNA                                             | LOC112442818 | 37556 | 3.00 | 0.03488 | Down |
| uncharacterized LOC112443819                                    | LOC112443819 | 46    | 2.08 | 0.04066 | Up   |
| uncharacterized LOC112443858                                    | LOC112443858 | 14    | 1.57 | 0.00935 | Down |
| uncharacterized LOC112444463                                    | LOC112444463 | 27    | 3.88 | 0.00000 | Down |
| uncharacterized LOC112444776                                    | LOC112444776 | 22    | 1.50 | 0.04044 | Up   |
| uncharacterized LOC112444778                                    | LOC112444778 | 24    | 1.55 | 0.01634 | Up   |
| uncharacterized LOC112444920                                    | LOC112444920 | 25    | 1.59 | 0.02206 | Down |
| endogenous retrovirus group K member 25 Env polypeptide-like    | LOC112446744 | 19    | 2.07 | 0.03188 | Up   |
| proline-rich protein 2-like                                     | LOC112446784 | 81    | 1.67 | 0.02989 | Down |
| uncharacterized LOC112447393                                    | LOC112447393 | 62    | 1.79 | 0.00634 | Down |

|                                                                    |              |      |      |         |      |
|--------------------------------------------------------------------|--------------|------|------|---------|------|
| pleckstrin homology domain-containing family B member 2 pseudogene | LOC112447770 | 10   | 1.86 | 0.00240 | Up   |
| uncharacterized LOC112448737                                       | LOC112448737 | 27   | 1.55 | 0.02007 | Up   |
| uncharacterized LOC112448796                                       | LOC112448796 | 22   | 1.69 | 0.00238 | Up   |
| uncharacterized LOC505183                                          | LOC505183    | 147  | 1.72 | 0.00636 | Up   |
| ring finger protein 213-like                                       | LOC512869    | 330  | 1.54 | 0.02054 | Down |
| vascular cell adhesion molecule 1-like                             | LOC534578    | 204  | 2.09 | 0.03571 | Up   |
| nucleosome assembly protein 1-like 1                               | LOC614785    | 13   | 1.59 | 0.02082 | Up   |
| phosphatidylcholine transfer protein                               | LOC616574    | 82   | 1.66 | 0.00026 | Up   |
| BOLA class I histocompatibility antigen, alpha chain BL3-7-like    | LOC617979    | 293  | 3.55 | 0.00863 | Up   |
| patched domain-containing protein 3                                | LOC782456    | 19   | 1.61 | 0.00589 | Down |
| ADP/ATP translocase 1                                              | LOC787122    | 19   | 2.11 | 0.00645 | Up   |
| uncharacterized LOC787465                                          | LOC787465    | 99   | 1.82 | 0.00692 | Up   |
| bax inhibitor 1 pseudogene                                         | LOC788342    | 39   | 1.60 | 0.00616 | Up   |
| solute carrier family 22 member 10-like                            | LOC788786    | 25   | 1.73 | 0.01143 | Up   |
| uncharacterized LOC788915                                          | LOC788915    | 94   | 4.98 | 0.04609 | Down |
| sialic acid-binding Ig-like lectin 14                              | LOC789748    | 363  | 2.23 | 0.02664 | Up   |
| leucine rich single-pass membrane protein 2                        | LSMEM2       | 27   | 1.95 | 0.04434 | Up   |
| latexin                                                            | LXN          | 93   | 1.77 | 0.00079 | Up   |
| lysozyme                                                           | LYZ          | 894  | 1.73 | 0.00010 | Up   |
| mitogen-activated protein kinase 12                                | MAPK12       | 204  | 1.51 | 0.00620 | Down |
| macrophage receptor with collagenous structure                     | MARCO        | 2813 | 2.20 | 0.01908 | Up   |
| microtubule associated serine/threonine kinase like                | MASTL        | 44   | 1.91 | 0.00141 | Up   |
| maternal embryonic leucine zipper kinase                           | MELK         | 40   | 1.71 | 0.03801 | Up   |
| MIS18 binding protein 1                                            | MIS18BP1     | 74   | 1.91 | 0.01043 | Up   |
| marker of proliferation Ki-67                                      | MKI67        | 1159 | 1.89 | 0.00712 | Up   |
| melanophilin                                                       | MLPH         | 122  | 1.92 | 0.00457 | Down |
| MMS22 like, DNA repair protein                                     | MMS22L       | 121  | 1.60 | 0.00111 | Up   |
| mutS homolog 5                                                     | MSH5         | 18   | 1.54 | 0.02348 | Up   |
| metallothionein-1A                                                 | MT1A         | 2897 | 5.65 | 0.00467 | Down |
| metallothionein 1E                                                 | MT1E         | 1292 | 3.40 | 0.00839 | Down |
| mitochondrial fission regulator 2                                  | MTFR2        | 19   | 1.86 | 0.01106 | Up   |
| myotubularin related protein 7                                     | MTMR7        | 34   | 1.78 | 0.00148 | Down |
| myomesin 1                                                         | MYOM1        | 4533 | 1.78 | 0.04488 | Down |
| non-SMC condensin I complex subunit G                              | NCAPG        | 71   | 1.96 | 0.00663 | Up   |
| NDC80 kinetochore complex component                                | NDC80        | 38   | 1.98 | 0.00471 | Up   |
| nei like DNA glycosylase 3                                         | NEIL3        | 12   | 1.87 | 0.00966 | Up   |
| NIMA related kinase 2                                              | NEK2         | 37   | 1.65 | 0.04376 | Up   |
| neuroligin 1                                                       | NLGN1        | 144  | 2.16 | 0.02588 | Up   |
| nuclear receptor subfamily 1 group D member 1                      | NR1D1        | 865  | 1.54 | 0.00668 | Down |
| neuritin 1                                                         | NRN1         | 34   | 1.50 | 0.03946 | Up   |
| NUF2 component of NDC80 kinetochore complex                        | NUF2         | 55   | 1.94 | 0.00061 | Up   |
| nucleolar and spindle associated protein 1                         | NUSAP1       | 70   | 2.02 | 0.00188 | Up   |

|                                                                |          |       |      |         |      |
|----------------------------------------------------------------|----------|-------|------|---------|------|
| obscurin, cytoskeletal calmodulin and titin-interacting RhoGEF | OBSCN    | 83    | 1.61 | 0.02497 | Down |
| origin recognition complex subunit 1                           | ORC1     | 27    | 2.38 | 0.00006 | Up   |
| PDZ binding kinase                                             | PBK      | 40    | 1.72 | 0.03343 | Up   |
| PCNA clamp associated factor                                   | PCLAF    | 51    | 1.91 | 0.01857 | Up   |
| programmed cell death 1 ligand 2                               | PDCD1LG2 | 192   | 1.54 | 0.03377 | Up   |
| prodynorphin                                                   | PDYN     | 86    | 2.53 | 0.01667 | Up   |
| profilin 2                                                     | PFN2     | 139   | 2.24 | 0.00020 | Down |
| pepsinogen 5, group I (pepsinogen A)                           | PGA5     | 12    | 1.88 | 0.01384 | Up   |
| polo like kinase 4                                             | PLK4     | 70    | 1.57 | 0.00903 | Up   |
| phospholipid transfer protein                                  | PLTP     | 1020  | 1.79 | 0.04536 | Up   |
| DNA polymerase theta                                           | POLQ     | 81    | 1.57 | 0.00703 | Up   |
| peroxisome proliferator activated receptor gamma               | PPARG    | 17    | 1.70 | 0.00311 | Up   |
| periplakin                                                     | PPL      | 5544  | 1.52 | 0.00672 | Down |
| protein regulator of cytokinesis 1                             | PRC1     | 83    | 1.79 | 0.01277 | Up   |
| proline rich 11                                                | PRR11    | 46    | 1.82 | 0.02431 | Up   |
| pancreatic trypsin inhibitor                                   | PTI      | 26    | 1.64 | 0.01934 | Down |
| Rac GTPase activating protein 1                                | RACGAP1  | 138   | 1.53 | 0.01657 | Up   |
| RAD51 recombinase                                              | RAD51    | 68    | 1.54 | 0.01333 | Up   |
| RAD51 associated protein 1                                     | RAD51AP1 | 28    | 1.62 | 0.00884 | Up   |
| Ras association domain family member 6                         | RASSF6   | 25    | 1.60 | 0.00273 | Up   |
| ribonucleoprotein, PTB binding 2                               | RAVER2   | 30    | 1.85 | 0.01056 | Up   |
| RAD52 motif containing 1                                       | RDM1     | 10    | 1.80 | 0.00849 | Up   |
| REC8 meiotic recombination protein                             | REC8     | 371   | 4.38 | 0.04611 | Up   |
| ribonuclease A family member 10 (inactive)                     | RNASE10  | 98    | 1.61 | 0.00041 | Up   |
| ring finger protein 150                                        | RNF150   | 319   | 1.67 | 0.00339 | Down |
| ribosomal protein L3 like                                      | RPL3L    | 37    | 1.76 | 0.00046 | Down |
| ribonucleotide reductase regulatory subunit M2                 | RRM2     | 163   | 1.88 | 0.01026 | Up   |
| ryanodine receptor 3                                           | RYR3     | 21    | 2.06 | 0.02164 | Down |
| S100 calcium binding protein A2                                | S100A2   | 1410  | 1.62 | 0.04911 | Down |
| S100 calcium binding protein A8                                | S100A8   | 39    | 1.58 | 0.03889 | Down |
| serum amyloid A4, constitutive                                 | SAA4     | 24128 | 1.55 | 0.02860 | Down |
| Scm polycomb group protein like 2                              | SCML2    | 23    | 1.50 | 0.01505 | Up   |
| stromal cell derived factor 2 like 1                           | SDF2L1   | 222   | 1.67 | 0.03569 | Down |
| SEC14 like lipid binding 6                                     | SEC14L6  | 429   | 1.59 | 0.01752 | Down |
| secreted frizzled related protein 1                            | SFRP1    | 327   | 2.78 | 0.00000 | Down |
| shugoshin 1                                                    | SGO1     | 33    | 1.90 | 0.00306 | Up   |
| SHC binding and spindle associated 1                           | SHCBP1   | 33    | 2.58 | 0.00024 | Up   |
| sialic acid binding Ig like lectin 15                          | SIGLEC15 | 34    | 1.89 | 0.03557 | Up   |
| spindle and kinetochore associated complex subunit 3           | SKA3     | 43    | 1.51 | 0.01628 | Up   |
| solute carrier family 13 member 5                              | SLC13A5  | 2488  | 3.14 | 0.01353 | Down |
| solute carrier family 22 member 16                             | SLC22A16 | 229   | 1.73 | 0.01507 | Down |
| solute carrier family 51 subunit alpha                         | SLC51A   | 70    | 2.12 | 0.02996 | Down |

|                                                                  |          |      |      |         |      |
|------------------------------------------------------------------|----------|------|------|---------|------|
| solute carrier family 7 member 5                                 | SLC7A5   | 49   | 2.07 | 0.00234 | Down |
| structural maintenance of chromosomes 2                          | SMC2     | 412  | 1.59 | 0.00198 | Up   |
| synuclein alpha                                                  | SNCA     | 119  | 4.11 | 0.00339 | Down |
| sperm associated antigen 5                                       | SPAG5    | 64   | 1.65 | 0.03242 | Up   |
| spindle apparatus coiled-coil protein 1                          | SPDL1    | 20   | 1.76 | 0.00512 | Up   |
| scaffold protein involved in DNA repair                          | SPIDR    | 935  | 1.64 | 0.04557 | Down |
| spectrin beta, erythrocytic                                      | SPTB     | 1058 | 1.60 | 0.00035 | Down |
| stathmin 1                                                       | STMN1    | 170  | 1.87 | 0.00256 | Up   |
| sulfotransferase family 2B member 1                              | SULT2B1  | 26   | 1.87 | 0.01808 | Down |
| transcription factor 19                                          | TCF19    | 64   | 1.70 | 0.02213 | Up   |
| thrombospondin type 1 domain containing 7A                       | THSD7A   | 166  | 1.50 | 0.00140 | Up   |
| TOPBP1 interacting checkpoint and replication regulator          | TICRR    | 31   | 1.73 | 0.01963 | Up   |
| toll like receptor 10                                            | TLR10    | 26   | 1.57 | 0.00368 | Up   |
| tropomodulin 1                                                   | TMOD1    | 16   | 1.52 | 0.01469 | Up   |
| DNA topoisomerase II alpha                                       | TOP2A    | 425  | 2.01 | 0.00337 | Up   |
| tumor protein p53 inducible nuclear protein 1                    | TP53INP1 | 7111 | 1.51 | 0.00112 | Up   |
| translocator protein 2                                           | TSPO2    | 14   | 2.73 | 0.00035 | Down |
| TTK protein kinase                                               | TTK      | 46   | 1.90 | 0.01124 | Up   |
| titin                                                            | TTN      | 554  | 1.55 | 0.00092 | Up   |
| ubiquitin conjugating enzyme E2 C                                | UBE2C    | 67   | 1.83 | 0.00783 | Up   |
| unc-79 homolog, NALCN channel complex subunit                    | UNC79    | 33   | 1.80 | 0.01519 | Up   |
| wolframin ER transmembrane glycoprotein                          | WFS1     | 548  | 1.59 | 0.01210 | Down |
| X-linked Kx blood group antigen, Kell and VPS13A binding protein | XK       | 87   | 1.55 | 0.04450 | Up   |
| zinc finger DHHC-type palmitoyltransferase 19                    | ZDHHC19  | 213  | 1.81 | 0.00984 | Down |

<sup>1</sup>Mid-lactation multiparous Holstein cows were retrospectively grouped as HE and LE (n = 12/group).

<sup>2</sup>Annotation of gene transcripts and affiliated gene symbols are based on the *Bos taurus* reference genome (release 106, ARS-UCS 1.2).

<sup>3</sup>Normalized mean read count as determined by DESeq2 (Love et al., 2014).

<sup>4</sup>Up or down expression relative to HE cow; Up = upregulated in HE compared with LE; Down = downregulated in HE compared with LE.

**Supplementary Table S4.** Gene Ontology domains enriched in upregulated differentially expressed genes in liver samples from cows that were high feed efficient (HE; n = 12) or low feed efficient (LE; n = 12)<sup>1</sup>.

| Gene Ontology                                                           | ID         | Gene Symbols <sup>2</sup>                                                                                                                                                                                       |
|-------------------------------------------------------------------------|------------|-----------------------------------------------------------------------------------------------------------------------------------------------------------------------------------------------------------------|
| <b>Biological Process</b>                                               |            |                                                                                                                                                                                                                 |
| cell division                                                           | GO:0051301 | <i>ASPM, BIRC5, CCNA2, CCNB1, CCNB2, CCNE2, CCNF, CDC25A, CDC6, CDCA8, CDK1, ERCC6L, FBXO5, KIF11, KNLI, MASTL, NCAPG, NDC80, NUF2, SGO1, SKA3, SPAG5, SPDLI, UBE2C</i>                                         |
| microtubule-based movement                                              | GO:0007018 | <i>CENPE, KIF11, KIF15, KIF18A, KIF20A, KIF22, KIF2C, KIF4A, KIFC1</i>                                                                                                                                          |
| mitotic cytokinesis                                                     | GO:0000281 | <i>ANLN, BIRC5, CEP55, CKAP2, ECT2, KIF20A, KIF4A, NUSAP1, RACGAP1</i>                                                                                                                                          |
| mitotic cell cycle                                                      | GO:0000278 | <i>ASPM, CENPE, CENPF, CENPW, KIF18A, MASTL, PLK4, SKA3</i>                                                                                                                                                     |
| chromosome segregation                                                  | GO:0007059 | <i>BIRC5, CENPW, DLGAP5, HJURP, NEK2, SKA3, TTK</i>                                                                                                                                                             |
| G2/M transition of mitotic cell cycle                                   | GO:0000086 | <i>BIRC5, CCNA2, CDC25A, CDK1, FOXM1, MASTL</i>                                                                                                                                                                 |
| mitotic metaphase plate congression                                     | GO:0007080 | <i>CCNB1, CDCA8, KIF18A, KIF22, KIFC1, SPDLI</i>                                                                                                                                                                |
| mitotic spindle assembly checkpoint                                     | GO:0007094 | <i>BIRC5, BUB1, BUB1B, KNTC1, SPDLI, TTK</i>                                                                                                                                                                    |
| mitotic sister chromatid segregation                                    | GO:0000070 | <i>CDCA8, ESPL1, KNTC1, NEK2, SGO1</i>                                                                                                                                                                          |
| mitotic spindle organization                                            | GO:0007052 | <i>CENPE, DLGAP5, KIF4A, NDC80, NUF2</i>                                                                                                                                                                        |
| mitotic cell cycle phase transition                                     | GO:0044772 | <i>CCNA2, CCNB1, CCNB2, CCNE2</i>                                                                                                                                                                               |
| mitotic DNA replication checkpoint                                      | GO:0033314 | <i>CDC6, CLSPN, ORC1, TICRR</i>                                                                                                                                                                                 |
| protein localization to kinetochore                                     | GO:0034501 | <i>CDK1, KNLI, SPDLI, TTK</i>                                                                                                                                                                                   |
| regulation of attachment of spindle microtubules to kinetochore         | GO:0051988 | <i>ECT2, NEK2, RACGAP1, SPAG5</i>                                                                                                                                                                               |
| regulation of cyclin-dependent protein serine/threonine kinase activity | GO:0000079 | <i>CCNA2, CCNB1, CCNB2, CCNE2</i>                                                                                                                                                                               |
| kinetochore organization                                                | GO:0051383 | <i>NDC80, NUF2, SMC2</i>                                                                                                                                                                                        |
| meiotic chromosome segregation                                          | GO:0045132 | <i>NUF2, SGO1, SMC2</i>                                                                                                                                                                                         |
| mitotic spindle midzone assembly                                        | GO:0051256 | <i>KIF4A, PRC1, RACGAP1</i>                                                                                                                                                                                     |
| positive regulation of chromosome segregation                           | GO:0051984 | <i>CDC6, NCAPG, SMC2</i>                                                                                                                                                                                        |
| <b>Cellular Component</b>                                               |            |                                                                                                                                                                                                                 |
| nucleus                                                                 | GO:0005634 | <i>ASPM, BIRC5, CCNA2, CCNB1, CCNB2, CCNE2, CCNF, CDC25A, CDC6, CDK1, CDKN2C, CENPF, CLSPN, DEPDC1, DLGAP5, E2F7, ECT2, ESPL1, EXO1, FBXO5, FOXM1, H2B, IGF2BP3, KIF11, KIF18A, KIF20A, KIF22, KNLI, MASTL,</i> |

|                                                    |            |                                                                                                                                                                                                                                                                                                                   |
|----------------------------------------------------|------------|-------------------------------------------------------------------------------------------------------------------------------------------------------------------------------------------------------------------------------------------------------------------------------------------------------------------|
|                                                    |            | <i>MKI67, MMS22L, NEIL3, NEK2, PBK, PCLAF, PLK4, PLTP, PPARG, PRR11, RAD51, RAD51AP1, RAVER2, SCML2, SGO1, SPDLI, TCF19, TICRR, TOP2A, TP53INP1, TTK, UBE2C</i>                                                                                                                                                   |
| cytoplasm                                          | GO:0005737 | <i>ASPM, BIRC5, CCNA2, CCNB1, CCNB2, CCNE2, CCNF, CCNF, CDC25A, CDKN2C, CENPF, CEP55, CFAP43, CKAP2, CKAP2L, CLEC7A, CYP2J2, DLGAP5, DNA2, ECT2, ESPL1, FBXO5, FGF21, IGF2BP3, KIF15, KIF18A, KIF22, KNTC1, MASTL, MELK, NCAPG, NEK2, NUSAP1, PLK4, PPARG, PRC1, PRR11, RAD51, SMC2, SPDLI, STMN1, TOP2A, TTK</i> |
| nucleoplasm                                        | GO:0005654 | <i>ANLN, BUB1, CCNA2, CDC20, CDC6, CDCA8, CDK1, CENPE, CENPF, CENPW, CLSPN, DNA2, E2F8, ESCO2, FANCI, FBXO5, HJURP, KIF20A, KIF4A, MASTL, NDC80, NEIL3, NEK2, NUF2, ORC1, POLQ, PPARG, PRC1, RACGAP1, SGO1, SMC2, TICRR, TOP2A</i>                                                                                |
| cytosol                                            | GO:0005829 | <i>BIRC5, BUB1, CCNA2, CDC20, CDC6, CDK1, CENPE, CIP2A, CKAP2, CKAP2L, DLGAP5, E2F8, ECT2, FANCI, GIMAP6, GIMAP8, IGF2BP3, KIF11, KIF22, KNTC1, NUF2, PLK4, POLQ, RDM1, RRM2, SGO1, SKA3, TICRR, TP53INP1, UBE2C</i>                                                                                              |
| centrosome                                         | GO:0005813 | <i>CCNB1, CCNB2, CCNE2, CDK1, CKAP2, CKAP2L, ESPL1, MASTL, NDC80, NEK2, PCLAF, PLK4, SGO1, SKA3</i>                                                                                                                                                                                                               |
| kinetochore                                        | GO:0000776 | <i>BIRC5, BUB1, CENPE, CENPW, ERCC6L, HJURP, KIF18A, KIF2C, KNLI, NEK2, REC8, SGO1, SKA3, TTK</i>                                                                                                                                                                                                                 |
| midbody                                            | GO:0030496 | <i>ANLN, ASPM, BIRC5, CDCA8, CDK1, CENPE, CENPF, CEP55, ECT2, KIF20A, KIF4A, NEK2, PRC1, RACGAP1</i>                                                                                                                                                                                                              |
| microtubule                                        | GO:0005874 | <i>CENPE, CKAP2, KIF15, KIF18A, KIF20A, KIF22, KIF2C, KIFC1, NUSAP1, STMN1</i>                                                                                                                                                                                                                                    |
| spindle pole                                       | GO:0000922 | <i>ASPM, CDC6, CENPF, CKAP2L, KIF11, KNTC1, NEK2, PLK4, SGO1, SPDLI</i>                                                                                                                                                                                                                                           |
| mitotic spindle                                    | GO:0072686 | <i>CDC6, CDK1, CKAP2L, ESPL1, KIF11, KIF22, NUSAP1, SKA3, SPAG5</i>                                                                                                                                                                                                                                               |
| chromosome, centromeric region                     | GO:0000775 | <i>BIRC5, CDCA8, CENPF, HJURP, SGO1, TOP2A</i>                                                                                                                                                                                                                                                                    |
| cleavage furrow                                    | GO:0032154 | <i>ECT2, KIF20A, MASTL, PLK4, RACGAP1</i>                                                                                                                                                                                                                                                                         |
| condensed chromosome outer kinetochore             | GO:0000940 | <i>BUB1B, CENPF, NDC80, SKA3, SPDLI</i>                                                                                                                                                                                                                                                                           |
| intercellular bridge                               | GO:0045171 | <i>CDC6, CDCA8, CEP55, KIF20A, PRC1</i>                                                                                                                                                                                                                                                                           |
| condensed chromosome                               | GO:0000793 | <i>NCAPG, SGO1, SMC2, TOP2A</i>                                                                                                                                                                                                                                                                                   |
| cyclin-dependent protein kinase holoenzyme complex | GO:0000307 | <i>CCNA2, CCNB1, CCNB2, CCNE2</i>                                                                                                                                                                                                                                                                                 |
| nuclear chromosome                                 | GO:0000228 | <i>MSH5, RAD51, SMC2, TOP2A</i>                                                                                                                                                                                                                                                                                   |
| spindle microtubule                                | GO:0005876 | <i>BIRC5, CDK1, KIF11, SKA3</i>                                                                                                                                                                                                                                                                                   |
| kinetochore microtubule                            | GO:0005828 | <i>CENPE, KIF18A, KNTC1</i>                                                                                                                                                                                                                                                                                       |
| mitotic spindle midzone                            | GO:1990023 | <i>CENPE, KIF18A, PRC1</i>                                                                                                                                                                                                                                                                                        |



## Molecular Function

|                                                                     |            |                                                                                                                                                                                         |
|---------------------------------------------------------------------|------------|-----------------------------------------------------------------------------------------------------------------------------------------------------------------------------------------|
| ATP binding                                                         | GO:0005524 | <i>BUB1, BUB1B, CDK1, CENPE, DNA2, ERCC6L, KIF11, KIF15, KIF18A, KIF20A, KIF22, KIF2C, KIF4A, KIFC1, MASTL, MELK, MSH5, NEK2, ORC1, PBK, PLK4, POLQ, RAD51, SMC2, TOP2A, TTK, UBE2C</i> |
| microtubule binding                                                 | GO:0008017 | <i>BIRC5, CENPE, CENPF, DLGAP5, GAS2L3, KIF11, KIF15, KIF18A, KIF20A, KIF22, KIF2C, KIF4A, KIFC1, NUSAP1, PRC1, RACGAP1</i>                                                             |
| chromatin binding                                                   | GO:0003682 | <i>CDK1, EXO1, ORC1, PCLAF, POLQ, PPARG, RAD51, REC8, SCML2, SMC2, TICRR, TOP2A</i>                                                                                                     |
| protein kinase binding                                              | GO:0019901 | <i>CCNA2, CDC25A, CDKN2C, FBXO5, FOXM1, KIF11, KIF20A, PRC1, RACGAP1</i>                                                                                                                |
| microtubule motor activity                                          | GO:0003777 | <i>CENPE, KIF15, KIF18A, KIF20A, KIF22, KIF2C, KIF4A, KIFC1</i>                                                                                                                         |
| single-stranded DNA binding                                         | GO:0003697 | <i>MMS22L, NEIL3, RAD51, RAD51AP1, SMC2</i>                                                                                                                                             |
| cyclin-dependent protein serine/threonine kinase regulator activity | GO:0016538 | <i>CCNA2, CCNB1, CCNB2, CCNE2</i>                                                                                                                                                       |
| anaphase-promoting complex binding                                  | GO:0010997 | <i>CDC20, CLSPN, FBXO5</i>                                                                                                                                                              |
| kinetochore binding                                                 | GO:0043515 | <i>CENPE, SPD1, TTK</i>                                                                                                                                                                 |
| pattern recognition receptor activity                               | GO:0038187 | <i>CLEC4E, CLEC6A, CLEC7A</i>                                                                                                                                                           |
| single-stranded DNA-dependent ATP-dependent DNA helicase activity   | GO:0017116 | <i>DNA2, POLQ, RAD51</i>                                                                                                                                                                |

<sup>1</sup>Enrichment analysis was performed using the Database for Annotation, Visualization, and Integrated Discovery (v. 2021) by comparing differentially expressed genes (mean read count  $\geq 10$ ;  $P$ -value  $\leq 0.05$ ; fold change  $\geq 1.5$ ). Fold enrichment and Benjamini corrected  $P$ -values are reported.

<sup>2</sup>Annotation of gene transcripts and affiliated gene symbols are based on the *Bos taurus* reference genome (release 106, ARS-UCD 1.2).

**Supplemental Table S5.** Differentially expressed genes in muscle tissue between high feed efficient (HE) and low feed efficient (LE) mid-lactation cows<sup>1</sup>.

| Gene <sup>2</sup>                                                  | Gene Symbol | Mean <sup>3</sup> | Fold Change | P-value | Expression <sup>4</sup> |
|--------------------------------------------------------------------|-------------|-------------------|-------------|---------|-------------------------|
| 3-hydroxybutyrate dehydrogenase 1                                  | BDH1        | 37                | 2.68        | 0.00111 | Down                    |
| 5'-nucleotidase, cytosolic II                                      | NT5C2       | 665               | 1.66        | 0.01628 | Down                    |
| abhydrolase domain containing 2, acylglycerol lipase               | ABHD2       | 1884              | 1.97        | 0.01157 | Down                    |
| actin related protein 1B                                           | ACTR1B      | 489               | 1.62        | 0.03951 | Down                    |
| activating transcription factor 3                                  | ATF3        | 2523              | 5.29        | 0.01645 | Down                    |
| acyl-CoA thioesterase 11                                           | ACOT11      | 28                | 2.75        | 0.00016 | Down                    |
| ADAM metalloproteinase with thrombospondin type 1 motif 20         | ADAMTS20    | 1269              | 1.79        | 0.03410 | Down                    |
| ADAM metalloproteinase with thrombospondin type 1 motif 3          | ADAMTS3     | 52                | 1.96        | 0.02738 | Down                    |
| ADAM metalloproteinase with thrombospondin type 1 motif 8          | ADAMTS8     | 17                | 3.38        | 0.03263 | Up                      |
| adenosylmethionine decarboxylase 1                                 | AMD1        | 952               | 1.54        | 0.04223 | Down                    |
| adhesion G protein-coupled receptor L1                             | ADGRL1      | 216               | 1.68        | 0.01797 | Up                      |
| ADP ribosylation factor like GTPase 4D                             | ARL4D       | 18                | 1.54        | 0.03327 | Up                      |
| ADP ribosylation factor like GTPase 5B                             | ARL5B       | 793               | 1.51        | 0.00795 | Down                    |
| aldolase, fructose-bisphosphate C                                  | ALDOC       | 24                | 1.58        | 0.04415 | Up                      |
| amphiphysin                                                        | AMPH        | 31                | 1.53        | 0.02850 | Up                      |
| angiotensinogen                                                    | AGT         | 51                | 1.73        | 0.04896 | Up                      |
| ankyrin repeat and BTB domain containing 2                         | ABTB2       | 166               | 2.16        | 0.02500 | Down                    |
| apelin                                                             | APLN        | 119               | 1.80        | 0.01837 | Up                      |
| apolipoprotein E                                                   | APOE        | 131               | 1.82        | 0.03985 | Up                      |
| aquaporin 11                                                       | AQP11       | 12                | 1.60        | 0.04887 | Up                      |
| armadillo repeat containing X-linked 3                             | ARMCX3      | 1383              | 1.63        | 0.00041 | Down                    |
| arrestin domain containing 3                                       | ARRDC3      | 608               | 1.50        | 0.01531 | Up                      |
| arylformamidase                                                    | AFMID       | 15                | 1.58        | 0.04843 | Up                      |
| ATPase H <sup>+</sup> transporting V0 subunit a4                   | ATP6V0A4    | 11                | 2.01        | 0.04939 | Down                    |
| ATPase Na <sup>+</sup> /K <sup>+</sup> transporting subunit beta 1 | ATP1B1      | 2435              | 1.56        | 0.03409 | Down                    |
| BAG cochaperone 2                                                  | BAG2        | 1286              | 1.52        | 0.01350 | Down                    |
| basic helix-loop-helix family member e23                           | BHLHE23     | 17                | 2.77        | 0.01463 | Up                      |
| beta-1,4-N-acetyl-galactosaminyltransferase 1                      | B4GALNT1    | 12                | 2.03        | 0.00411 | Up                      |
| bicaudal D homolog 1 (Drosophila) pseudogene                       | BICD1       | 300               | 2.38        | 0.00151 | Up                      |
| BMP2 inducible kinase                                              | BMP2K       | 1232              | 1.94        | 0.01545 | Down                    |
| brain derived neurotrophic factor                                  | BDNF        | 33                | 2.52        | 0.01751 | Down                    |
| BTB domain and CNC homolog 1                                       | BACH1       | 1446              | 1.84        | 0.01157 | Down                    |
| calcium voltage-gated channel auxiliary subunit beta 2             | CACNB2      | 46                | 1.53        | 0.04640 | Up                      |
| calcium/calmodulin dependent protein kinase kinase 1               | CAMKK1      | 18                | 1.56        | 0.04343 | Up                      |
| calmodulin regulated spectrin associated protein family member 3   | CAMSAP3     | 18                | 1.93        | 0.03791 | Up                      |

|                                                                                |             |       |       |         |      |
|--------------------------------------------------------------------------------|-------------|-------|-------|---------|------|
| cAMP responsive element modulator                                              | CREM        | 247   | 2.01  | 0.01434 | Down |
| carboxypeptidase X, M14 family member 2                                        | CPXM2       | 71    | 1.87  | 0.01219 | Up   |
| CASK interacting protein 1                                                     | CASKIN1     | 10    | 2.06  | 0.00987 | Up   |
| cathepsin K                                                                    | CTSK        | 757   | 1.81  | 0.03354 | Down |
| cell migration inducing hyaluronidase 2                                        | CEMIP2      | 7621  | 1.92  | 0.01768 | Down |
| ceramide synthase 4                                                            | CERS4       | 14    | 1.59  | 0.03086 | Up   |
| choline kinase alpha                                                           | CHKA        | 83    | 1.90  | 0.03461 | Down |
| chondroadherin                                                                 | CHAD        | 40    | 1.85  | 0.04635 | Up   |
| chromobox 8                                                                    | CBX8        | 52    | 1.72  | 0.02139 | Up   |
| chromosome 15 C11orf52 homolog                                                 | C15H11orf52 | 41    | 2.00  | 0.04694 | Down |
| coiled-coil domain containing 136                                              | CCDC136     | 46    | 1.66  | 0.00946 | Down |
| collagen triple helix repeat containing 1                                      | CTHRC1      | 29    | 2.46  | 0.02718 | Down |
| collagen type VI alpha 5 chain                                                 | COL6A5      | 326   | 10.23 | 0.00103 | Up   |
| complement factor B                                                            | CFB         | 167   | 3.23  | 0.00794 | Up   |
| connector enhancer of kinase suppressor of Ras 2                               | CNKSR2      | 525   | 1.58  | 0.02855 | Down |
| crystallin lambda 1                                                            | CRYL1       | 258   | 1.52  | 0.04602 | Down |
| CYLD lysine 63 deubiquitinase                                                  | CYLD        | 1385  | 1.56  | 0.03604 | Down |
| cysteine and glycine rich protein 3                                            | CSRP3       | 10548 | 2.38  | 0.04787 | Down |
| cysteine and serine rich nuclear protein 1                                     | CSRNP1      | 460   | 3.39  | 0.04830 | Down |
| cysteine rich secretory protein LCCL domain containing 1                       | CRISPLD1    | 11    | 1.74  | 0.01258 | Up   |
| cytochrome P450 family 1 subfamily A member 1                                  | CYP1A1      | 42    | 2.05  | 0.02290 | Up   |
| cytochrome P450 family 2 subfamily B member 6                                  | CYP2B6      | 16    | 2.82  | 0.03958 | Up   |
| DIX domain containing 1                                                        | DIXDC1      | 1367  | 1.60  | 0.03347 | Down |
| DNA damage inducible transcript 3                                              | DDIT3       | 226   | 1.89  | 0.03016 | Down |
| DNA damage inducible transcript 4                                              | DDIT4       | 2751  | 1.90  | 0.01568 | Up   |
| DNA topoisomerase I                                                            | TOP1        | 1722  | 1.53  | 0.02389 | Down |
| DnaJ heat shock protein family (Hsp40) member B4                               | DNAJB4      | 4198  | 1.89  | 0.03559 | Down |
| DOT1 like histone lysine methyltransferase                                     | DOT1L       | 2262  | 1.89  | 0.01708 | Down |
| dual oxidase 2                                                                 | DUOX2       | 22    | 3.02  | 0.01759 | Up   |
| dystrophin related protein 2                                                   | DRP2        | 18    | 2.29  | 0.00510 | Up   |
| EF-hand and coiled-coil domain containing 1                                    | EFCC1       | 13    | 2.31  | 0.00107 | Up   |
| EF-hand domain containing 1                                                    | EFHC1       | 15    | 1.75  | 0.00681 | Up   |
| endoplasmic reticulum aminopeptidase 2                                         | ERAP2       | 303   | 1.68  | 0.00223 | Up   |
| endothelin receptor type A                                                     | EDNRA       | 46    | 1.58  | 0.01576 | Up   |
| establishment of sister chromatid cohesion N-acetyltransferase 1               | ESCO1       | 926   | 1.68  | 0.02850 | Down |
| estrogen related receptor beta                                                 | ESRRB       | 105   | 1.88  | 0.00778 | Down |
| eukaryotic translation initiation factor 4E                                    | EIF4E       | 1494  | 1.51  | 0.01276 | Down |
| exoribonuclease 1                                                              | ERI1        | 76    | 1.55  | 0.02274 | Down |
| extracellular leucine rich repeat and fibronectin type III domain containing 2 | ELFN2       | 18    | 2.63  | 0.01906 | Up   |
| FA complementation group I                                                     | FANCI       | 20    | 1.50  | 0.03162 | Up   |
| estrogen-induced osteoclastogenesis regulator 1                                | FAM102A     | 150   | 1.86  | 0.04810 | Down |

|                                                      |        |       |        |         |      |
|------------------------------------------------------|--------|-------|--------|---------|------|
| FAT atypical cadherin 3                              | FAT3   | 26    | 1.77   | 0.00927 | Up   |
| fatty acid binding protein 3                         | FABP3  | 1364  | 1.89   | 0.00983 | Down |
| fatty acid desaturase 2                              | FADS2  | 137   | 1.64   | 0.01706 | Up   |
| FERM domain containing kindlin 1                     | FERMT1 | 28    | 1.52   | 0.03827 | Up   |
| fibrillin 3                                          | FBN3   | 11    | 3.87   | 0.02412 | Up   |
| fibroblast growth factor 12                          | FGF12  | 17    | 1.65   | 0.01788 | Up   |
| fibronectin type III domain containing 1             | FNDC1  | 166   | 1.62   | 0.02816 | Up   |
| fin bud initiation factor homolog                    | FIBIN  | 143   | 1.76   | 0.00447 | Up   |
| folliculin interacting protein 2                     | FNIP2  | 1577  | 3.12   | 0.00830 | Down |
| forkhead box D3                                      | FOXD3  | 32    | 1.86   | 0.00257 | Up   |
| frizzled class receptor 4                            | FZD4   | 872   | 1.50   | 0.02284 | Up   |
| fructose-bisphosphatase 1                            | FBP1   | 93    | 2.68   | 0.00915 | Up   |
| G protein-coupled receptor 63                        | GPR63  | 39    | 1.78   | 0.00547 | Up   |
| gasdermin B                                          | GSDMB  | 56    | 1.92   | 0.02251 | Up   |
| glucosaminyl N-acetyl) transferase 4                 | GCNT4  | 67    | 2.10   | 0.01032 | Down |
| glutamate ionotropic receptor kainate type subunit 5 | GRIK5  | 15    | 1.56   | 0.04312 | Up   |
| glutamate ionotropic receptor NMDA type subunit 3A   | GRIN3A | 23    | 2.62   | 0.01383 | Up   |
| glutathione S-transferase omega 1                    | GSTO1  | 79    | 137.19 | 0.00000 | Down |
| glycosyltransferase 1 domain containing 1            | GLT1D1 | 194   | 1.98   | 0.01343 | Down |
| glypican 3                                           | GPC3   | 109   | 1.50   | 0.04799 | Up   |
| golgin A4                                            | GOLGA4 | 16379 | 1.61   | 0.00037 | Down |
| growth regulating estrogen receptor binding 1        | GREB1  | 832   | 2.63   | 0.02227 | Down |
| GTP cyclohydrolase I feedback regulator              | GCHFR  | 23    | 1.81   | 0.00126 | Up   |
| heme oxygenase 2                                     | HMOX2  | 530   | 2.26   | 0.04215 | Down |
| hemicentin 1                                         | HMCN1  | 245   | 2.51   | 0.00495 | Down |
| hexokinase 2                                         | HK2    | 9826  | 2.46   | 0.01856 | Down |
| homeodomain interacting protein kinase 2             | HIPK2  | 1123  | 1.62   | 0.02570 | Down |
| hyaluronan binding protein 4                         | HABP4  | 457   | 1.60   | 0.03011 | Down |
| immediate early response 3                           | IER3   | 589   | 2.25   | 0.02645 | Down |
| inhibin subunit alpha                                | INHA   | 11    | 2.45   | 0.02497 | Up   |
| inositol polyphosphate multikinase                   | IPMK   | 273   | 2.13   | 0.01423 | Down |
| insulin like growth factor 2                         | IGF2   | 4795  | 1.55   | 0.00262 | Up   |
| integrator complex subunit 6 like                    | INTS6L | 27    | 1.56   | 0.04260 | Up   |
| interferon lambda receptor 1                         | IFNLR1 | 181   | 2.28   | 0.03777 | Down |
| interferon related developmental regulator 1         | IFRD1  | 1771  | 2.60   | 0.02729 | Down |
| kelch like family member 30                          | KLHL30 | 721   | 2.86   | 0.02529 | Down |
| kelch like family member 40                          | KLHL40 | 4554  | 2.70   | 0.02520 | Down |
| kinectin 1                                           | KTN1   | 4699  | 1.58   | 0.00037 | Down |
| kinesin family member 1A                             | KIF1A  | 37    | 2.08   | 0.01445 | Up   |
| L1 cell adhesion molecule                            | L1CAM  | 34    | 1.60   | 0.02901 | Up   |
| leptin receptor                                      | LEPR   | 108   | 1.53   | 0.02324 | Up   |
| leucine rich repeat containing 3B                    | LRRC3B | 20    | 1.71   | 0.01691 | Up   |

|                                                                     |              |       |      |         |      |
|---------------------------------------------------------------------|--------------|-------|------|---------|------|
| leucine rich repeat containing 4                                    | LRRC4        | 11    | 1.96 | 0.00537 | Up   |
| leucine rich repeat containing 8 VRAC subunit B                     | LRRC8B       | 344   | 3.38 | 0.01111 | Down |
| leucine rich repeat neuronal 3                                      | LRRN3        | 31    | 2.27 | 0.04638 | Down |
| LIM homeobox 6                                                      | LHX6         | 56    | 1.56 | 0.01153 | Up   |
| lipin 1                                                             | LPIN1        | 6111  | 1.58 | 0.03856 | Down |
| LON peptidase N-terminal domain and ring finger 3                   | LONRF3       | 1515  | 1.73 | 0.02102 | Down |
| mab-21 like 1                                                       | MAB21L1      | 42    | 1.75 | 0.01481 | Up   |
| macrophage stimulating 1                                            | MST1         | 15    | 1.80 | 0.03731 | Up   |
| MAF bZIP transcription factor F                                     | MAFF         | 1130  | 2.70 | 0.01592 | Down |
| MAPK activated protein kinase 3                                     | MAPKAPK3     | 1154  | 1.70 | 0.03634 | Down |
| marker of proliferation Ki-67                                       | MKI67        | 67    | 1.72 | 0.04741 | Up   |
| mastermind like transcriptional coactivator 3                       | MAML3        | 80    | 1.58 | 0.00187 | Up   |
| methyltransferase 21C, AARS1 lysine                                 | METTL21C     | 321   | 3.05 | 0.00973 | Down |
| minichromosome maintenance 10 replication initiation factor         | MCM10        | 223   | 1.51 | 0.02165 | Down |
| mitogen-activated protein kinase kinase 3                           | MAP2K3       | 1117  | 1.78 | 0.04112 | Down |
| mohawk homeobox                                                     | MKX          | 11    | 2.07 | 0.03348 | Up   |
| mono-ADP ribosylhydrolase 2                                         | MACROD2      | 39    | 1.57 | 0.04076 | Up   |
| monoamine oxidase B                                                 | MAOB         | 232   | 1.80 | 0.03808 | Up   |
| myogenin                                                            | MYOG         | 810   | 1.80 | 0.03481 | Down |
| myomaker, myoblast fusion factor                                    | MYMK         | 53    | 1.58 | 0.04268 | Up   |
| myosin heavy chain 8                                                | MYH8         | 1900  | 1.59 | 0.02933 | Up   |
| myosin light chain kinase family member 4                           | MYLK4        | 1707  | 2.26 | 0.04413 | Down |
| myosin VB                                                           | MYO5B        | 41    | 1.97 | 0.01973 | Up   |
| N-acetylglucosamine-1-phosphate transferase subunits alpha and beta | GNPTAB       | 2125  | 2.79 | 0.01262 | Down |
| NCK associated protein 5                                            | NCKAP5       | 16    | 2.31 | 0.03567 | Up   |
| nectin cell adhesion molecule 3                                     | NECTIN3      | 401   | 1.60 | 0.03955 | Down |
| NEDD4 binding protein 2 like 2                                      | N4BP2L2      | 3972  | 1.52 | 0.03056 | Down |
| neurotrophic receptor tyrosine kinase 2                             | NTRK2        | 343   | 1.51 | 0.01123 | Up   |
| nexilin F-actin binding protein                                     | NEXN         | 15277 | 1.70 | 0.00418 | Down |
| Nik related kinase                                                  | NRK          | 162   | 1.65 | 0.02241 | Up   |
| NIPA magnesium transporter 2                                        | NIPA2        | 731   | 1.61 | 0.01764 | Down |
| collagen type XXII alpha 1 chain                                    | COL22A1      | 37    | 2.94 | 0.04581 | Up   |
| uncharacterized CYR61                                               | CYR61        | 884   | 1.67 | 0.01003 | Up   |
| uncharacterized FAM84A                                              | FAM84A       | 20    | 2.11 | 0.00649 | Up   |
| heat shock factor binding protein 1 like 1                          | HSBP1L1      | 11    | 1.87 | 0.01147 | Up   |
| uncharacterized KIAA1551                                            | KIAA1551     | 971   | 1.57 | 0.02958 | Down |
| kelch like family member 34                                         | KLHL34       | 5620  | 1.50 | 0.04678 | Down |
| uncharacterized LOC100126544                                        | LOC100126544 | 29    | 1.56 | 0.03395 | Down |
| uncharacterized LOC100196897                                        | LOC100196897 | 100   | 2.15 | 0.01231 | Down |
| uncharacterized LOC100196898                                        | LOC100196898 | 14    | 1.67 | 0.04550 | Down |
| 60S ribosomal protein L31 pseudogene                                | LOC100297150 | 105   | 1.80 | 0.01455 | Down |

|                                                                           |              |      |      |         |      |
|---------------------------------------------------------------------------|--------------|------|------|---------|------|
| uncharacterized LOC100850659                                              | LOC100850659 | 52   | 2.23 | 0.00153 | Up   |
| uncharacterized LOC101902998                                              | LOC101902998 | 35   | 1.67 | 0.03715 | Up   |
| uncharacterized LOC101903290                                              | LOC101903290 | 674  | 2.00 | 0.00156 | Up   |
| 60S ribosomal protein L15 pseudogene                                      | LOC101903301 | 34   | 5.45 | 0.00040 | Down |
| uncharacterized LOC101903873                                              | LOC101903873 | 88   | 1.84 | 0.02679 | Up   |
| transcription factor BTF3 homolog 4 pseudogene                            | LOC101904275 | 17   | 1.53 | 0.03395 | Up   |
| polycystic kidney disease and receptor for egg jelly-related protein      | LOC101904413 | 55   | 1.92 | 0.02250 | Down |
| zinc finger protein 160 pseudogene                                        | LOC101905179 | 38   | 2.20 | 0.00000 | Down |
| tetraspanin-3 pseudogene                                                  | LOC101906398 | 19   | 1.91 | 0.00824 | Up   |
| uncharacterized LOC101907117                                              | LOC101907117 | 117  | 1.81 | 0.02960 | Up   |
| tropomyosin alpha-3 chain-like                                            | LOC104970173 | 44   | 1.55 | 0.02558 | Up   |
| uncharacterized LOC104970622                                              | LOC104970622 | 13   | 2.14 | 0.00195 | Up   |
| uncharacterized LOC104970902                                              | LOC104970902 | 17   | 2.01 | 0.03768 | Down |
| uncharacterized LOC104971707                                              | LOC104971707 | 18   | 3.37 | 0.00584 | Down |
| polycystic kidney disease and receptor for egg jelly-related protein-like | LOC104972622 | 12   | 2.14 | 0.02448 | Down |
| uncharacterized LOC104975960                                              | LOC104975960 | 12   | 1.77 | 0.02849 | Down |
| uncharacterized LOC104976281                                              | LOC104976281 | 3396 | 1.90 | 0.02302 | Down |
| sialic acid-binding Ig-like lectin 14                                     | LOC107131224 | 12   | 2.26 | 0.00625 | Down |
| uncharacterized LOC107132478                                              | LOC107132478 | 13   | 3.38 | 0.00291 | Up   |
| uncharacterized LOC107132490                                              | LOC107132490 | 25   | 1.59 | 0.01235 | Down |
| uncharacterized LOC107132649                                              | LOC107132649 | 13   | 1.97 | 0.01210 | Down |
| uncharacterized LOC107132707                                              | LOC107132707 | 46   | 1.77 | 0.03500 | Down |
| uncharacterized LOC107133222                                              | LOC107133222 | 12   | 1.65 | 0.04303 | Down |
| uncharacterized LOC112441829                                              | LOC112441829 | 26   | 1.53 | 0.03662 | Up   |
| uncharacterized LOC112441863                                              | LOC112441863 | 35   | 4.02 | 0.00211 | Down |
| uncharacterized LOC112442189                                              | LOC112442189 | 37   | 1.77 | 0.01053 | Up   |
| small nucleolar RNA SNORA16B/SNORA16A family                              | LOC112443648 | 37   | 1.54 | 0.03077 | Up   |
| U4atac minor spliceosomal RNA                                             | LOC112443671 | 590  | 1.67 | 0.03663 | Up   |
| 40S ribosomal protein S24 pseudogene                                      | LOC112444773 | 24   | 1.92 | 0.01497 | Down |
| uncharacterized LOC112446006                                              | LOC112446006 | 71   | 1.87 | 0.02397 | Down |
| small Cajal body-specific RNA 4                                           | LOC112446113 | 30   | 1.62 | 0.03197 | Up   |
| small nucleolar RNA SNORA23                                               | LOC112446862 | 170  | 1.60 | 0.00780 | Up   |
| pregnancy zone protein                                                    | LOC506828    | 34   | 2.95 | 0.01775 | Up   |
| keratin-associated protein 5-1                                            | LOC515676    | 28   | 7.90 | 0.00004 | Up   |
| tyrosine-protein phosphatase non-receptor type 11                         | LOC526769    | 96   | 2.98 | 0.02912 | Down |
| cystatin-13                                                               | LOC531692    | 76   | 1.97 | 0.00648 | Down |
| vascular cell adhesion molecule 1-like                                    | LOC534578    | 24   | 2.17 | 0.00950 | Up   |
| dnaJ homolog subfamily A member 3, mitochondrial pseudogene               | LOC534627    | 55   | 2.05 | 0.04292 | Down |
| glyceraldehyde-3-phosphate dehydrogenase pseudogene                       | LOC615002    | 64   | 1.63 | 0.00774 | Up   |
| glyceraldehyde-3-phosphate dehydrogenase pseudogene                       | LOC617654    | 89   | 1.73 | 0.00133 | Up   |

|                                                                          |           |      |       |         |      |
|--------------------------------------------------------------------------|-----------|------|-------|---------|------|
| retinoic acid early transcript 1E                                        | LOC785982 | 249  | 4.15  | 0.03084 | Down |
| uncharacterized LOC787122                                                | LOC787122 | 108  | 2.17  | 0.01563 | Up   |
| 40S ribosomal protein S23                                                | LOC787803 | 106  | 1.86  | 0.00745 | Up   |
| aflatoxin B1 aldehyde reductase member 4                                 | LOC788425 | 37   | 1.50  | 0.02347 | Up   |
| uncharacterized LOC790886                                                | LOC790886 | 35   | 4.42  | 0.00113 | Up   |
| purinergic receptor P2Y13                                                | P2RY13    | 27   | 1.74  | 0.02830 | Down |
| selenophosphate synthetase 2                                             | SEPHS2    | 925  | 2.02  | 0.04997 | Down |
| tigger transposable element derived 4                                    | TIGD4     | 31   | 2.44  | 0.01049 | Up   |
| NPC intracellular cholesterol transporter 1                              | NPC1      | 699  | 2.52  | 0.02481 | Down |
| nuclear receptor subfamily 4 group A member 3                            | NR4A3     | 5015 | 33.59 | 0.00000 | Down |
| nucleotide binding oligomerization domain containing 2                   | NOD2      | 43   | 2.36  | 0.00213 | Down |
| nudE neurodevelopment protein 1 like 1                                   | NDEL1     | 1362 | 1.62  | 0.03397 | Down |
| oxidative stress responsive serine rich 1                                | OSER1     | 1441 | 1.54  | 0.04686 | Down |
| peroxisome proliferator activated receptor delta                         | PPARD     | 1035 | 2.73  | 0.01145 | Down |
| phosphatidylinositol specific phospholipase C X domain containing 2      | PLCXD2    | 153  | 1.64  | 0.03047 | Down |
| phosphatidylinositol-3,4,5-trisphosphate dependent Rac exchange factor 1 | PREX1     | 390  | 1.62  | 0.02513 | Down |
| phosphodiesterase 4D                                                     | PDE4D     | 5506 | 1.89  | 0.01800 | Down |
| phosphoenolpyruvate carboxykinase 2, mitochondrial                       | PCK2      | 21   | 2.46  | 0.02093 | Up   |
| phospholipase C beta 1                                                   | PLCB1     | 251  | 1.99  | 0.00097 | Down |
| Pim-1 proto-oncogene, serine/threonine kinase                            | PIM1      | 837  | 2.06  | 0.04619 | Down |
| podoplanin                                                               | PDPN      | 143  | 2.07  | 0.04026 | Down |
| potassium voltage-gated channel subfamily Q member 1                     | KCNQ1     | 10   | 1.84  | 0.00766 | Up   |
| PPARG coactivator 1 alpha                                                | PPARGC1A  | 3623 | 4.99  | 0.00495 | Down |
| prolyl 4-hydroxylase subunit alpha 3                                     | P4HA3     | 67   | 2.22  | 0.01487 | Down |
| protein kinase AMP-activated non-catalytic subunit gamma 2               | PRKAG2    | 1103 | 2.75  | 0.00911 | Down |
| protein kinase cGMP-dependent 2                                          | PRKG2     | 13   | 2.25  | 0.02153 | Up   |
| protein phosphatase 1 regulatory subunit 15A                             | PPP1R15A  | 2035 | 4.13  | 0.02116 | Down |
| protein phosphatase 1 regulatory subunit 36                              | PPP1R36   | 16   | 1.66  | 0.01261 | Down |
| protein phosphatase targeting COQ7                                       | PPTC7     | 1816 | 1.64  | 0.04237 | Down |
| protein tyrosine phosphatase non-receptor type 3                         | PTPN3     | 359  | 2.03  | 0.00956 | Down |
| proteoglycan 4                                                           | PRG4      | 68   | 2.88  | 0.03739 | Down |
| RAB15 effector protein                                                   | REP15     | 76   | 2.08  | 0.02689 | Down |
| RAR related orphan receptor C                                            | RORC      | 100  | 1.57  | 0.02111 | Up   |
| Ras association domain family member 4                                   | RASSF4    | 44   | 1.52  | 0.03843 | Up   |
| Ras association domain family member 8                                   | RASSF8    | 1191 | 1.78  | 0.00361 | Down |
| regulator of calcineurin 2                                               | RCAN2     | 238  | 1.65  | 0.02370 | Down |
| regulator of G protein signaling 6                                       | RGS6      | 133  | 1.51  | 0.01216 | Up   |
| regulatory factor X2                                                     | RFX2      | 154  | 2.63  | 0.02881 | Down |
| reticulophagy regulator 1                                                | RETREG1   | 5351 | 3.17  | 0.00658 | Down |
| retinol binding protein 4                                                | RBP4      | 222  | 1.90  | 0.02902 | Up   |

|                                                                      |              |      |      |         |      |
|----------------------------------------------------------------------|--------------|------|------|---------|------|
| retinyl ester hydrolase type 1                                       | BREH1        | 18   | 1.84 | 0.04565 | Up   |
| Rho associated coiled-coil containing protein kinase 2               | ROCK2        | 8062 | 1.84 | 0.00926 | Down |
| ribonuclease A family member 10 (inactive)                           | RNASE10      | 68   | 1.50 | 0.02444 | Up   |
| ribosome biogenesis regulator 1 homolog                              | RRS1         | 239  | 1.66 | 0.01718 | Down |
| ring finger protein 115                                              | RNF115       | 1208 | 1.75 | 0.02029 | Down |
| ring finger protein 41                                               | RNF41        | 381  | 1.75 | 0.03614 | Down |
| RNA binding motif protein 20                                         | RBM20        | 5137 | 1.66 | 0.03788 | Down |
| RNA binding motif protein 7                                          | RBM7         | 339  | 1.50 | 0.02124 | Down |
| ROS proto-oncogene 1, receptor tyrosine kinase                       | ROS1         | 17   | 2.48 | 0.04220 | Down |
| RRAD, Ras related glycolysis inhibitor and calcium channel regulator | RRAD         | 2085 | 2.31 | 0.03694 | Down |
| RUNX family transcription factor 1                                   | RUNX1        | 487  | 2.63 | 0.03183 | Down |
| S100 calcium binding protein A9                                      | S100A9       | 34   | 2.17 | 0.03981 | Down |
| secreted phosphoprotein 2                                            | SPP2         | 15   | 2.75 | 0.00140 | Up   |
| serine protease 53                                                   | PRSS53       | 35   | 1.50 | 0.00183 | Up   |
| SH3 domain containing ring finger 3                                  | SH3RF3       | 61   | 1.62 | 0.02537 | Up   |
| shroom family member 2                                               | SHROOM2      | 21   | 2.20 | 0.00908 | Up   |
| shroom family member 3                                               | SHROOM3      | 122  | 2.13 | 0.00943 | Up   |
| slit guidance ligand 2                                               | SLIT2        | 50   | 1.66 | 0.03342 | Down |
| small nucleolar RNA SNORA63                                          | LOC112448305 | 13   | 2.12 | 0.00051 | Up   |
| small nucleolar RNA SNORA70                                          | LOC112443079 | 34   | 1.84 | 0.00457 | Up   |
| small nucleolar RNA SNORA70                                          | LOC112447183 | 25   | 1.77 | 0.00999 | Up   |
| small nucleolar RNA SNORA71                                          | LOC112449443 | 92   | 1.83 | 0.00162 | Up   |
| small nucleolar RNA SNORD116                                         | LOC112443258 | 17   | 1.55 | 0.02234 | Up   |
| small nucleolar RNA SNORD116                                         | LOC112443276 | 19   | 2.00 | 0.00849 | Up   |
| small nucleolar RNA SNORD14                                          | LOC112441683 | 17   | 2.95 | 0.00021 | Up   |
| small nucleolar RNA SNORD36                                          | LOC112448904 | 39   | 1.88 | 0.00166 | Up   |
| small nucleolar RNA U3                                               | LOC112442867 | 787  | 1.77 | 0.01535 | Up   |
| small nucleolar RNA Z195/SNORD33/SNORD32 family                      | LOC112442484 | 75   | 1.58 | 0.03124 | Up   |
| small nucleolar RNA SNORD89                                          | LOC112448929 | 1149 | 1.57 | 0.01018 | Up   |
| small nucleolar RNA SNORA12                                          | LOC112444563 | 39   | 1.59 | 0.00809 | Up   |
| small nucleolar RNA SNORA31                                          | LOC112449172 | 52   | 1.76 | 0.00646 | Up   |
| small nucleolar RNA SNORA49                                          | LOC112442094 | 52   | 1.52 | 0.00586 | Up   |
| small nucleolar RNA SNORA52                                          | LOC112444967 | 45   | 2.41 | 0.00019 | Up   |
| solute carrier family 16 member 5                                    | SLC16A5      | 556  | 1.64 | 0.02743 | Down |
| solute carrier family 25 member 33                                   | SLC25A33     | 106  | 2.30 | 0.01357 | Down |
| solute carrier family 28 member 1                                    | SLC28A1      | 11   | 3.16 | 0.03886 | Down |
| solute carrier family 38 member 4                                    | SLC38A4      | 88   | 3.23 | 0.01223 | Up   |
| sperm antigen with calponin homology and coiled-coil domains 1       | SPECC1       | 2936 | 1.59 | 0.02420 | Down |
| sphingomyelin phosphodiesterase 3                                    | SMPD3        | 67   | 3.37 | 0.00232 | Up   |
| stearoyl-CoA desaturase                                              | SCD          | 7005 | 1.64 | 0.01950 | Up   |
| sterile alpha motif domain containing 14                             | SAMD14       | 21   | 1.80 | 0.00382 | Up   |



|                                               |              |       |      |         |      |
|-----------------------------------------------|--------------|-------|------|---------|------|
| sterile alpha motif domain containing 15      | SAMD15       | 60    | 1.76 | 0.01030 | Down |
| sushi, nidogen and EGF like domains 1         | SNED1        | 129   | 1.77 | 0.02597 | Down |
| syndecan 4                                    | SDC4         | 1646  | 3.70 | 0.01159 | Down |
| teneurin transmembrane protein 4              | TENM4        | 124   | 1.83 | 0.02028 | Up   |
| testis specific serine kinase 3               | TSSK3        | 16    | 7.04 | 0.03740 | Down |
| thioredoxin interacting protein               | TXNIP        | 24995 | 1.62 | 0.00327 | Up   |
| thrombospondin 4                              | THBS4        | 641   | 2.30 | 0.00082 | Up   |
| thrombospondin type 1 domain containing 4     | THSD4        | 34    | 1.61 | 0.03917 | Up   |
| thyroid hormone responsive                    | THRSP        | 55    | 2.45 | 0.03276 | Up   |
| TNF receptor associated factor 1              | TRAF1        | 321   | 2.61 | 0.00062 | Up   |
| transcobalamin 1                              | TCN1         | 13    | 2.74 | 0.02890 | Down |
| transcriptional and immune response regulator | TCIM         | 175   | 1.57 | 0.04423 | Up   |
| transmembrane protein 120B                    | TMEM120B     | 880   | 1.54 | 0.03678 | Down |
| transmembrane protein 251                     | TMEM251      | 176   | 1.80 | 0.00746 | Down |
| tripartite motif containing 54                | TRIM54       | 7030  | 1.53 | 0.02863 | Down |
| tumor protein p53 inducible nuclear protein 2 | TP53INP2     | 1336  | 1.69 | 0.02068 | Down |
| U1 spliceosomal RNA                           | LOC112449629 | 36    | 2.44 | 0.00425 | Up   |
| U2 spliceosomal RNA                           | LOC112442853 | 90    | 2.83 | 0.00621 | Up   |
| U4 spliceosomal RNA                           | LOC112442110 | 578   | 1.88 | 0.00249 | Up   |
| U4 spliceosomal RNA                           | LOC112442111 | 464   | 1.68 | 0.01278 | Up   |
| U6 spliceosomal RNA                           | LOC112448206 | 26    | 1.88 | 0.02750 | Down |
| ubiquitin specific peptidase 50               | USP50        | 49    | 1.84 | 0.01140 | Down |
| VANGL planar cell polarity protein 2          | VANGL2       | 15    | 1.55 | 0.03462 | Up   |
| vascular endothelial growth factor A          | VEGFA        | 2618  | 1.96 | 0.02116 | Down |
| vasohibin 1                                   | VASH1        | 114   | 1.51 | 0.01678 | Up   |
| von Willebrand factor A domain containing 2   | VWA2         | 24    | 2.70 | 0.00485 | Up   |
| Wnt ligand secretion mediator                 | WLS          | 959   | 1.76 | 0.02305 | Down |
| xin actin binding repeat containing 1         | XIRP1        | 62013 | 4.79 | 0.00395 | Down |
| X-prolyl aminopeptidase 2                     | XPNPEP2      | 23    | 2.12 | 0.00165 | Up   |
| zinc finger and BTB domain containing 10      | ZBTB10       | 1019  | 1.57 | 0.02276 | Down |
| zinc finger and BTB domain containing 43      | ZBTB43       | 848   | 2.06 | 0.01602 | Down |
| zinc finger protein 385B                      | ZNF385B      | 162   | 2.42 | 0.00150 | Down |
| zinc finger protein 774                       | ZNF774       | 554   | 1.90 | 0.01718 | Down |
| zinc finger RANBP2-type containing 1          | ZRANB1       | 2647  | 1.51 | 0.01023 | Down |
| zinc finger SWIM-type containing 4            | ZSWIM4       | 243   | 2.42 | 0.03391 | Down |

<sup>1</sup>Mid-lactation multiparous Holstein cows were retrospectively grouped as HE and LE (n = 8/group).

<sup>2</sup>Annotation of gene transcripts and affiliated gene symbols are based on the *Bos taurus* reference genome (release 106, ARS-UCS 1.2).

<sup>3</sup>Normalized mean read count as determined by DESeq2 (Love et al., 2014).

<sup>4</sup>Up or down expression relative to HE cows; Up = upregulated in HE compared with LE; Down = downregulated in HE compared with LE.

**Supplementary Table S6.** Gene Ontology domains enriched in differentially expressed genes in muscle samples from cows that were high feed efficient (HE; n = 8) or low feed efficient (LE; n = 8)<sup>1</sup>.

| Gene Ontology                              | ID         | Gene Symbols <sup>2</sup>                                                                                                                                                                                                                                                                                                                 |
|--------------------------------------------|------------|-------------------------------------------------------------------------------------------------------------------------------------------------------------------------------------------------------------------------------------------------------------------------------------------------------------------------------------------|
| Upregulated in HE                          |            |                                                                                                                                                                                                                                                                                                                                           |
| Cell Component: extracellular space        | GO:0005615 | <i>AGT, APLN, APOE, CHAD, COL6A5, CPXM2, CRISPLD1, ELFN2, FZD4, IGF2, INHA, LOC506828, LOC515676, LRRC3B, MST1, RBP4, THBS4, VASH1, VWA2</i>                                                                                                                                                                                              |
| Molecular Function: actin filament binding | GO:0051015 | <i>CACNB2, CAMSAP3, FERMT1, MYH8, MYO5B, SAMD14, SHROOM2, SHROOM3</i>                                                                                                                                                                                                                                                                     |
| Downregulated in HE                        |            |                                                                                                                                                                                                                                                                                                                                           |
| Cell Component: nucleus                    | GO:0005634 | <i>ARMCX3, ATF3, BACH1, BMP2K, CREM, CSRNPI, CSRP3, DDIT3, DOT1L, EIF4E, ESCO1, ESRRB, FABP3, HABP4, HIPK2, IER3, IFRD1, IPMK, LPIN1, MAFF, MAPKAPK3, MCM10, METTL21C, MYOG, N4BP2L2, NR4A3, PDE4D, PLCB1, PPARD, PPARGC1A, PRKAG2, RBM20, RBM7, RCAN2, RFX2, ROCK2, RUNX1, S100A9, TP53INP2, ZBTB10, ZBTB43, ZNF385B, ZNF774, ZRANB1</i> |

<sup>1</sup>Enrichment analysis was performed using the Database for Annotation, Visualization, and Integrated Discovery (v. 2021) by comparing differentially expressed genes (mean read count  $\geq 10$ ;  $P$ -value  $\leq 0.05$ ; fold change  $\geq 1.5$ ). Fold enrichment and Benjamini corrected  $P$ -values are reported.

<sup>2</sup>Annotation of gene transcripts and affiliated gene symbols are based on the *Bos taurus* reference genome (release 106, ARS-UCD 1.2).
